# Supplementary material for: Ligand effects on gas adsorption in nanoporous phthalocyanine crystals
Source: Royal Society of Chemistry journal article supplement (doi:10.1039/d4cc03896g), 2024-01-01
Supplement: d4cc03896g1.pdf [file d4cc03896g1.pdf]

Supplementary Information to

**Ligand Effects on Gas Adsorption in Nanoporous Phthalocyanine Crystals**

Nikolaos-Angelos Stamos,<sup>1</sup> Charles J. McMonagle,<sup>2</sup> Gemma F. Turner,<sup>3</sup> David R. Allan,<sup>3</sup> Mark R. Warren,<sup>3</sup> Anna J. Warren,<sup>c</sup> Neil B. McKeown\*<sup>1</sup> and Stephen A. Moggach\*<sup>3</sup>

<sup>1</sup> EastChem School of Chemistry, David Brewster Road, The University of Edinburgh, Edinburgh, EH9 3FJ, United Kingdom

<sup>2</sup> Swiss–Norwegian Beamlines, European Synchrotron Radiation Facility, Grenoble 38043, France

<sup>3</sup> Diamond House, Harwell Science and Innovation Campus, Fermi Ave, Didcot OX11 0DE, United Kingdom

<sup>3</sup> School of Molecular Sciences, The University of Western Australia, 35 Stirling Highway, Crawley, Perth, WA, 6009 Australia

## Contents

|                                                            |   |
|------------------------------------------------------------|---|
| <b>S1.</b> Synthesis of PNCs .....                         | 1 |
| <b>S2.</b> Single Crystal X-Ray Diffraction .....          | 2 |
| <b>S3.</b> Crystallographic and Structural Parameters..... | 5 |
| <b>S4.</b> Curvature of Phthalocyanine .....               | 6 |

## S1. Synthesis of PNCs

### Materials and methods

Molecular components (dipPhO)<sub>8</sub>PcCo and (dipPhO)<sub>8</sub>PcH<sub>2</sub> were prepared, purified and characterised as previously reported.<sup>1</sup> Commercially available reagents were purchased from Sigma-Aldrich and used without further purification. Unless otherwise stated all reactions were carried out under an inert atmosphere of dry nitrogen gas. Oven-dried glassware was left in a 100 °C oven for at least 2 hrs and cooled under dry nitrogen flow prior to use. Melting points were recorded using a Gallenkamp melting point apparatus and are uncorrected. Infra-red spectra were recorded in the range 4000-600 cm<sup>-1</sup> using a Jasco FTIR-660 plus spectrometer. Elemental analysis was carried out with a Carlo Erba EA1101 or a CE 440 elemental analyser. UV/vis absorption spectra were recorded in the range 200-800 nm using a Jasco V-570 UV/vis/NIR spectrophotometer. Volumetric N<sub>2</sub> sorption studies were undertaken at 77 K using a Beckman Coulter 3100 Surface Area Analyzer (Fullerton, California, USA). <sup>1</sup>H NMR spectra were measured in CDCl<sub>3</sub> using an Advance Bruker DPX 400 instrument (400 MHz), with <sup>13</sup>C NMR spectra recorded at 100 MHz respectively. MALDI-TOF mass spectroscopic analyses were performed with a Waters MALDI Micro MX spectrometer. Thermogravimetric analysis was performed on a TA SDT Q 600 instrument.

### Cobalt 2,3,9,10,16,17,23,24-octa(2',6'-di-iso-propylphenoxy)phthalocyanine (PcCo)

A stirred solution of 4,5-bis(2,6-di-iso-propylphenoxy)phthalonitrile (0.50 g, 1.04 mmol) and cobalt(II) acetate (0.18 g, 1.01 mmol) in anhydrous NMP (1 ml) was heated at 165 °C for 20 h under nitrogen. The reaction mixture was cooled to room temperature and poured into water (15 ml). The crude product was collected by filtration. Purification by column chromatography on SiO<sub>2</sub>, eluting with hexane-DCM (4:6), gave the title compound as a green solid (0.22 g, 40%). M.p. >300 °C; IR (film)/cm<sup>-1</sup> 2961, 1612, 1456, 1462, 1413, 1353, 1269, 1186, 1095, 1050, 904, 864, 799, 777, 755, 729; UV/vis (DCM):  $\lambda_{max}$  673, 608, 404, 331, 302, 229 nm; MS (MALDI-TOF): cluster centred at m/z 1982.055 (MH<sup>+</sup>); elemental analysis calc (%) for C<sub>128</sub>H<sub>144</sub>N<sub>8</sub>O<sub>8</sub>Co: C 77.59, H 7.32, N 5.66 found C 77.68, H 7.52, N 5.52.

### Crystallisation of PNCs

Single crystals of PNC[Co-cbipy-Co] and PNC[Co-cbpm-Co] were grown as previously reported.<sup>1</sup>

## S2. Single Crystal X-Ray Diffraction in a Gas Cell

Single crystal X-ray diffraction experiments were carried out using a static quartz capillary gas cell (5 mm outer diameter) on beamline I19-2 at Diamond Light Source, United Kingdom.<sup>2</sup> A single crystal of PNC[Co-cbipy-Co] and PNC[Co-cbpm-Co] were each glued to a MiTeGen loop to avoid movement of the crystal upon introduction of gas. The goniometer head was connected to a gas rig through stainless-steel capillary tubing (Swagelok SS-T1-S-014-6ME). The crystals were initially treated under high vacuum ( $10^{-6}$  mbar) for at least 10 minutes to remove as much residual solvent as possible. After exposing PNC[Co-cbipy-Co] and PNC[Co-cbpm-Co] to CO or NO, the crystal was then evacuated for at least 10 minutes to determine the reversibility of the gas uptake in the pores. Collections were carried out successively on a single crystal of either PNC[Co-cbipy-Co] or PNC[Co-cbpm-Co].

Diffraction data were collected using an X-ray wavelength of 0.6889 Å, an exposure time of 1 s and a step size of 0.5°. Data were integrated and reduced in Xia2,<sup>3</sup> and an absorption correction was applied using AIMLESS.<sup>3</sup> Crystal structures were solved using ShelXT<sup>4</sup> and refined against  $|F^2|$  using ShelXL<sup>5</sup> in Olex2.<sup>6</sup> The aromatic rings in the phthalocyanine units were restrained to hexagonal geometry. All other geometric parameters were refined freely. Thermal similarity restraints were applied to the phenyl rings and isopropyl groups on the phthalocyanine unit, and on the CO or NO ligands, where applicable. The pore volume and electron-count per pore were calculated using the SQUEEZE algorithm in PLATON.<sup>7</sup>

Abridged crystallographic data are given in *Tables S1-2*.

**Supplementary Table 1.** Experimental crystallographic data for PNC[Co-cbipy-Co] under vacuum, CO and NO environments in the gas cell.

| Gas cell conditions                                                          | Vacuum ( $10^{-6}$ mbar, 10 min)                                                  | 5 bar CO                                                                          | 2.63 bar NO                                                                       | Vacuum ( $10^{-6}$ mbar, 10 min)                                                  |
|------------------------------------------------------------------------------|-----------------------------------------------------------------------------------|-----------------------------------------------------------------------------------|-----------------------------------------------------------------------------------|-----------------------------------------------------------------------------------|
| Chemical formula                                                             | $\text{Co}_2\text{C}_{266}\text{H}_{288}\text{N}_{18}\text{O}_{16}$               | $\text{Co}_2\text{C}_{266.74}\text{H}_{288}\text{N}_{18}\text{O}_{16.74}$         | $\text{Co}_2\text{C}_{266}\text{H}_{288}\text{N}_{20}\text{O}_{18}$               | $\text{Co}_2\text{C}_{266}\text{H}_{288}\text{N}_{20}\text{O}_{18}$               |
| $M_r$                                                                        | 4111.11                                                                           | 4131.84                                                                           | 4171.12                                                                           | 4171.12                                                                           |
| Crystal system, space group                                                  | Cubic, $Pn\bar{3}n$                                                               | Cubic, $Pn\bar{3}n$                                                               | Cubic, $Pn\bar{3}n$                                                               | Cubic, $Pn\bar{3}n$                                                               |
| Temperature (K)                                                              | 298                                                                               | 180                                                                               | 180                                                                               | 298                                                                               |
| $a$ (Å)                                                                      | 37.8156(2)                                                                        | 37.438(2)                                                                         | 37.9704(2)                                                                        | 37.785(2)                                                                         |
| $V$ (Å <sup>3</sup> )                                                        | 54077.0(5)                                                                        | 54628.9(5)                                                                        | 54743.9(5)                                                                        | 53946.7(5)                                                                        |
| $Z$                                                                          | 6                                                                                 | 6                                                                                 | 6                                                                                 | 6                                                                                 |
| Radiation type                                                               | Synchrotron, $\lambda = 0.6889$ Å                                                 |
| $\mu$ (mm <sup>-1</sup> )                                                    | 0.13                                                                              | 0.13                                                                              | 0.13                                                                              | 0.14                                                                              |
| Crystal size (mm)                                                            | 0.1 x 0.1 x 0.1                                                                   |
| Diffractometer                                                               | Pilatus 300K                                                                      | Pilatus 300K                                                                      | Pilatus 300K                                                                      | Pilatus 300K                                                                      |
| Absorption correction                                                        | Empirical correction, CCP4 7.0.027: AIMLESS, version 0.5.31, spherical harmonics. | Empirical correction, CCP4 7.0.027: AIMLESS, version 0.5.31, spherical harmonics. | Empirical correction, CCP4 7.0.027: AIMLESS, version 0.5.31, spherical harmonics. | Empirical correction, CCP4 7.0.027: AIMLESS, version 0.5.31, spherical harmonics. |
| $T_{\min}, T_{\max}$                                                         | 0.976, 1.000                                                                      | 0.977, 1.000                                                                      | 0.974, 1.000                                                                      | 0.984, 1.000                                                                      |
| No. of measured, independent and observed [ $I > 2.0\sigma(I)$ ] reflections | 213161, 6495, 4049                                                                | 181240, 4769, 3653                                                                | 181688, 4792, 3659                                                                | 179058, 4738, 3237                                                                |
| $R_{\text{int}}$                                                             | 0.1187                                                                            | 0.1057                                                                            | 0.0940                                                                            | 0.0962                                                                            |
| $\sigma_{\text{max}}$ (°)                                                    | 22.499                                                                            | 20.136                                                                            | 20.143                                                                            | 20.143                                                                            |
| $R[F^2 > 2\sigma(F^2)], wR(F^2), S$                                          | 0.0930, 0.3121, 1.101                                                             | 0.0920, 0.2601, 1.054                                                             | 0.0873, 0.2555, 1.092                                                             | 0.0947, 0.3145, 1.093                                                             |
| No. of reflections                                                           | 4049                                                                              | 4769                                                                              | 4792                                                                              | 4738                                                                              |
| No. of parameters                                                            | 262                                                                               | 273                                                                               | 280                                                                               | 280                                                                               |
| No. of restraints                                                            | 302                                                                               | 304                                                                               | 315                                                                               | 316                                                                               |
| H-atom treatment                                                             | H-atom parameters constrained                                                     | H-atom parameters constrained                                                     | H-atom parameters constrained                                                     | H-atom parameters constrained                                                     |
| $\rho_{\text{max}}, \rho_{\text{min}}$ (e Å <sup>-3</sup> )                  | 0.771, -0.622                                                                     | 0.708, -0.627                                                                     | 0.648, -0.609                                                                     | 0.628, -0.421                                                                     |

**Table S2.** Experimental crystallographic data for PNC[Co-cbpm-Co] under vacuum, CO and NO environments in the gas cell.

| Gas cell conditions                                                          | Vacuum (10 <sup>-6</sup> mbar, 10 min)                                                   | 5 bar CO                                                                                 | Vacuum (10 <sup>-6</sup> mbar, 38 min)                                                   | 4-28 bar NO                                                                              | Vacuum (10 <sup>-6</sup> mbar, 10 min)                                                   |
|------------------------------------------------------------------------------|------------------------------------------------------------------------------------------|------------------------------------------------------------------------------------------|------------------------------------------------------------------------------------------|------------------------------------------------------------------------------------------|------------------------------------------------------------------------------------------|
| Chemical formula                                                             | Co <sub>2</sub> C <sub>264</sub> H <sub>286</sub> N <sub>20</sub> O <sub>16</sub>        | Co <sub>2</sub> C <sub>264.62</sub> H <sub>286</sub> N <sub>20</sub> O <sub>16</sub>     | Co <sub>2</sub> C <sub>264</sub> H <sub>286</sub> N <sub>20</sub> O <sub>16</sub>        | Co <sub>2</sub> C <sub>264</sub> H <sub>286</sub> N <sub>22</sub> O <sub>18</sub>        | Co <sub>2</sub> C <sub>264</sub> H <sub>286</sub> N <sub>22</sub> O <sub>18</sub>        |
| $M_r$                                                                        | 4113.09                                                                                  | 4130.45                                                                                  | 4113.09                                                                                  | 4173.10                                                                                  | 4173.10                                                                                  |
| Crystal system, space group                                                  | Cubic, $Pn\bar{3}n$                                                                      |
| Temperature (K)                                                              | 298                                                                                      | 180                                                                                      | 298                                                                                      | 180                                                                                      | 298                                                                                      |
| $a$ (Å)                                                                      | 37.7457(3)                                                                               | 37.8873(2)                                                                               | 37.7086(3)                                                                               | 37.9112(2)                                                                               | 37.6730(5)                                                                               |
| $V$ (Å <sup>3</sup> )                                                        | 53777.7(6)                                                                               | 54385.2(6)                                                                               | 53619.0(7)                                                                               | 54488.2(6)                                                                               | 53467.6(11)                                                                              |
| $Z$                                                                          | 6                                                                                        | 6                                                                                        | 6                                                                                        | 6                                                                                        | 6                                                                                        |
| Radiation type                                                               | Synchrotron, $\lambda = 0.6889$ Å                                                        |
| $\mu$ (mm <sup>-1</sup> )                                                    | 0.14                                                                                     | 0.13                                                                                     | 0.14                                                                                     | 0.13                                                                                     | 0.14                                                                                     |
| Crystal size (mm)                                                            | 0.1 x 0.1 x 0.1                                                                          |
| Diffractometer                                                               | Pilatus 300K                                                                             |
| Absorption correction                                                        | Empirical correction, <i>CCP4</i> 7.0.027: AIMLESS, version 0.5.31, spherical harmonics. | Empirical correction, <i>CCP4</i> 7.0.027: AIMLESS, version 0.5.31, spherical harmonics. | Empirical correction, <i>CCP4</i> 7.0.027: AIMLESS, version 0.5.31, spherical harmonics. | Empirical correction, <i>CCP4</i> 7.0.027: AIMLESS, version 0.5.31, spherical harmonics. | Empirical correction, <i>CCP4</i> 7.0.027: AIMLESS, version 0.5.31, spherical harmonics. |
| $T_{\min}, T_{\max}$                                                         | 0.986, 1.000                                                                             | 0.985, 1.000                                                                             | 0.986, 1.000                                                                             | 0.985, 1.000                                                                             | 0.991, 1.000                                                                             |
| No. of measured, independent and observed [ $I > 2.0\sigma(I)$ ] reflections | 175822, 4714, 2771                                                                       | 177785, 4769, 3229                                                                       | 175135, 4693, 2678                                                                       | 178040, 4771, 3280                                                                       | 173529, 4680, 2401                                                                       |
| $R_{\text{int}}$                                                             | 0.1007                                                                                   | 0.0897                                                                                   | 0.1027                                                                                   | 0.0981                                                                                   | 0.1295                                                                                   |
| $\vartheta_{\text{max}}$ (°)                                                 | 20.128                                                                                   | 20.138                                                                                   | 20.134                                                                                   | 20.132                                                                                   | 20.132                                                                                   |
| $R[F^2 > 2\sigma(F^2)], wR(F^2), S$                                          | 0.1283, 0.3590, 1.278                                                                    | 0.1053, 0.3570, 1.400                                                                    | 0.0864, 0.2927, 1.007                                                                    | 0.1005, 0.3487, 1.391                                                                    | 0.1220, 0.3693, 1.218                                                                    |
| No. of reflections                                                           | 4714                                                                                     | 4769                                                                                     | 4693                                                                                     | 4771                                                                                     | 4680                                                                                     |
| No. of parameters                                                            | 256                                                                                      | 260                                                                                      | 317                                                                                      | 270                                                                                      | 269                                                                                      |
| No. of restraints                                                            | 287                                                                                      | 323                                                                                      | 321                                                                                      | 332                                                                                      | 332                                                                                      |
| H-atom treatment                                                             | H-atom parameters constrained                                                            |
| $\rho_{\text{max}}, \rho_{\text{min}}$ (e Å <sup>-3</sup> )                  | 0.936, -0.691                                                                            | 0.625, -0.444                                                                            | 0.728, -0.348                                                                            | 0.583, -0.379                                                                            | 0.662, -0.646                                                                            |

### S3. Crystallographic and Structural Parameters

**Table S3.** Unit cell dimensions and structural parameters for ligand binding in PNC[*vA*-Co-*cL*-Co-*vA*], where L is bipy or bpm and A is CO or NO, during gas dosing. Note that the structures are listed in chronological order of analysis.

| PNC[ <i>vA</i> -Co- <i>cbipy</i> -Co- <i>vA</i> ] |                                |                            |         |           |               |           |
|---------------------------------------------------|--------------------------------|----------------------------|---------|-----------|---------------|-----------|
| Conditions                                        | <i>a/b/c</i> (Å <sup>3</sup> ) | <i>V</i> (Å <sup>3</sup> ) | A % [c] | Co-A (Å)  | ∠Co-C/N-O (°) | Co-L (Å)  |
| Ambient [a]                                       | 37.8533(2)                     | 54238.9(5)                 | 0       | n/a       | n/a           | 2.215(8)  |
| Vacuum, 10 min [b]                                | 37.8156(2)                     | 54077.0(5)                 | 0       | n/a       | n/a           | 2.205(8)  |
| 5.0 bar CO [a]                                    | 37.9438(2)                     | 54628.9(5)                 | 37      | 1.96(4)   | 180.00(2)     | 2.230(8)  |
| 2.6 bar NO [a],[d]                                | 37.9704(2)                     | 54743.9(5)                 | 100     | 1.898(11) | 120.6(9)      | 2.393(8)  |
| Vacuum, 10 min [b]                                | 37.7852(2)                     | 53946.7(5)                 | 100     | 1.914(11) | 117.0(7)      | 2.106(11) |
| PNC[ <i>vA</i> -Co- <i>cbpm</i> -Co- <i>vA</i> ]  |                                |                            |         |           |               |           |
| Vacuum, 10 min [b]                                | 37.6730(5)                     | 53777.7(6)                 | 0       | n/a       | n/a           | 2.302(15) |
| 5.0 bar CO [a]                                    | 37.9111(2)                     | 54487.8(5)                 | 31      | 1.81(3)   | 180.00(2)     | 2.335(12) |
| 5.0 bar CO [a],[e]                                | 37.8873(2)                     | 54385.2(6)                 | 31      | 1.87(4)   | 180.00(2)     | 2.313(12) |
| Vacuum, 24 min                                    | 37.7086(3)                     | 53619.3(7)                 | 0       | n/a       | n/a           | 2.293(11) |
| 4-28 bar NO                                       | 37.9112(2)                     | 54488.2(6)                 | 100     | 1.888(11) | 120.5(12)     | 2.483(11) |
| Vacuum 10 min                                     | 37.6730(5)                     | 53467.6(1)                 | 100     | 1.972(19) | 112.5(16)     | 2.413(15) |

[a] *T* = 180 K; [b] *T* = 298 K; [c] refined crystallographic occupancy of CO or NO; [d] measurement taken after crystal was treated under high vacuum for at least 10 min; [e] different crystal used in measurement, which was then used for all subsequent measurements.

**Table S4.** Cavity and void dimensions, and distortion of the Co-phthalocyanine unit (*d*) in PNC[Co-*cL*-Co-*vA*], where L is bipy or bpm and A is CO or NO, during gas dosing. Note that the structures are listed in chronological order of analysis.

| PNC[Co- <i>cbipy</i> -Co- <i>vA</i> ] |                                                  |                                |                                                |                              |                                     |                                     |                             |
|---------------------------------------|--------------------------------------------------|--------------------------------|------------------------------------------------|------------------------------|-------------------------------------|-------------------------------------|-----------------------------|
| Conditions                            | Cavity <i>V</i> (Å <sup>3</sup> ) <sup>[e]</sup> | Cavity <i>e</i> <sup>[e]</sup> | Void <i>V</i> (Å <sup>3</sup> ) <sup>[e]</sup> | Void <i>e</i> <sup>[e]</sup> | <i>cCo</i> ...Co (Å) <sup>[f]</sup> | <i>vCo</i> ...Co (Å) <sup>[g]</sup> | <i>d</i> (Å) <sup>[h]</sup> |
| Ambient [a]                           | 3642                                             | 822                            | 18559                                          | 2391                         | 11.561(2)                           | 26.292(2)                           | 0.60(3)                     |
| Vacuum, 10 min [b]                    | 3336                                             | 672                            | 18371                                          | 2033                         | 11.566(2)                           | 26.250(1)                           | 0.60(3)                     |
| 5.0 bar CO [a]                        | 3438                                             | 810                            | 18538                                          | 2951                         | 11.566(2)                           | 26.358(2)                           | 0.61(4)                     |
| 2.6 bar NO [a],[c]                    | 3492                                             | 882                            | 18461                                          | 3087                         | 11.931(2)                           | 26.039(2)                           | 0.79(3)                     |
| Vacuum, 10 min [b]                    | 3216                                             | 972                            | 17939                                          | 1204                         | 11.505(2)                           | 26.280(2)                           | 0.58(4)                     |
| PNC[Co- <i>cbpm</i> -Co- <i>vA</i> ]  |                                                  |                                |                                                |                              |                                     |                                     |                             |
| Vacuum, 10 min [b]                    | 3348                                             | 420                            | 18142                                          | 3929                         | 11.505(3)                           | 26.106(2)                           | 0.62(4)                     |
| 5.0 bar CO [a]                        | 3978                                             | 1128                           | 18705                                          | 2582                         | 11.707(3)                           | 26.204(2)                           | 0.67(3)                     |
| 5.0 bar CO [a],[d]                    | 3984                                             | 1092                           | 18691                                          | 2327                         | 11.696(3)                           | 26.191(2)                           | 0.66(4)                     |
| Vacuum, 24 min                        | 3426                                             | 564                            | 18168                                          | 1271                         | 11.653(3)                           | 26.056(2)                           | 0.64(4)                     |
| 4-28 bar NO                           | 3613                                             | 1170                           | 18226                                          | 2950                         | 12.040(2)                           | 25.871(2)                           | 0.83(3)                     |
| Vacuum 10 min                         | 3108                                             | 636                            | 17578                                          | 4200                         | 11.904(4)                           | 25.749(2)                           | 0.79(4)                     |

[a] *T* = 180 K; [b] *T* = 298 K; [c] measurement taken after crystal was treated under high vacuum for at least 10 min; [d] different crystal used in measurement, which was then used for all subsequent measurements; [e] Cavity and nanovoid volume per unit cell and total quantity of guest adsorbed in each pore per unit cell from PLATON SQUEEZE,<sup>8</sup> using a probe radius of 1.2 Å and truncation of 1.2 Å; [f] distance between Co<sup>2+</sup> centres across the cavity; [g] distance between Co<sup>2+</sup> centres across the nanovoid; [h] distance between Co<sup>2+</sup> and a plane defined by the O-atoms in the phthalocyanine unit.

#### S4. Curvature of Phthalocyanine

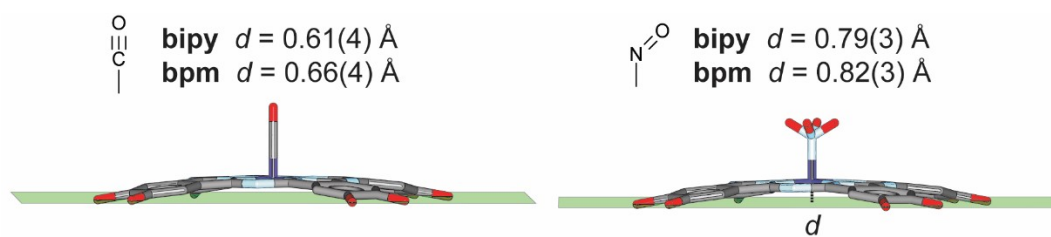

**Figure S1.** Curvature of phthalocyanine group chemisorption of NO, taken as the distance between the  $\text{Co}^{2+}$  centre and the plane made by the O-atoms in the phthalocyanine unit.



## References

1. C. Grazzia Bezzu, M. Helliwell, J. E. Warren, D. R. Allan and N. B. McKeown, *Science*, 2010, **327**, 1627-1630.
2. H. Nowell, S. A. Barnett, K. E. Christensen, S. J. Teat and D. R. Allan, *J. Synchrotron Radiat.*, 2012, **19**, 435-441.
3. G. Winter, *J Appl Cryst*, 2010, **43**, 186-190.
4. G. M. Sheldrick, *Acta Cryst A*, 2015, **A71**, 3-8.
5. G. M. Sheldrick, *Acta Cryst C*, 2015, **C71**, 3-8.
6. O. V. Dolomanov, L. J. Bourhis, R. J. Gildea, J. A. K. Howard and H. Puschmann, *J Appl Cryst*, 2009, **42**, 339-341.
7. A. L. Spek, *Acta Cryst C*, 2015, **C71**, 9-18.
8. A. L. Spek, *Acta Cryst. C*, 2015, **71**, 9-18.
